# Supplementary material for: Association between Brain and Plasma Glutamine Levels in Healthy Young Subjects Investigated by MRS and LC/MS
Source: MDPI journal article supplement (doi:10.3390/nu11071649), 2019-07-19
Supplement: s1 [file s1]

A

| PCC       |           | tCr       | GABA       | Gln        | Glu       | GSH       | mI        | tNAA      | tCho      |
|-----------|-----------|-----------|------------|------------|-----------|-----------|-----------|-----------|-----------|
| 1st       | Male 1    | 1         | 10         | 10         | 3         | 6         | 4         | 2         | 3         |
|           | Male 2    | 2         | 12         | 12         | 4         | 6         | 6         | 2         | 4         |
|           | Male 3    | 1         | 11         | 11         | 3         | 6         | 4         | 2         | 3         |
|           | Male 4    | 2         | 14         | 11         | 3         | 6         | 5         | 2         | 3         |
|           | Male 5    | 2         | 10         | 10         | 3         | 6         | 4         | 1         | 3         |
|           | Male 6    | 2         | 10         | 10         | 3         | 7         | 4         | 2         | 3         |
|           | Male 7    | 2         | 11         | 10         | 3         | 6         | 4         | 1         | 3         |
|           | Male 8    | 1         | 11         | 12         | 3         | 6         | 4         | 1         | 3         |
|           | Male 9    | 2         | 10         | 8          | 3         | 6         | 5         | 2         | 4         |
|           | Male 10   | 2         | 10         | 11         | 3         | 7         | 4         | 2         | 4         |
|           | Female 1  | 2         | 12         | 11         | 3         | 6         | 5         | 2         | 3         |
|           | Female 2  | 1         | 9          | 11         | 3         | 6         | 4         | 1         | 3         |
|           | Female 3  | 2         | 11         | 14         | 3         | 6         | 5         | 2         | 4         |
|           | Female 4  | 2         | 11         | 14         | 3         | 7         | 5         | 2         | 4         |
|           | Female 5  | 1         | 11         | 13         | 3         | 6         | 4         | 1         | 3         |
|           | Female 6  | 2         | 10         | 9          | 3         | 9         | 7         | 2         | 4         |
|           | Female 7  | 1         | 9          | 9          | 3         | 5         | 4         | 1         | 3         |
|           | Female 8  | 2         | 11         | 9          | 3         | 6         | 4         | 2         | 4         |
|           | Female 9  | 1         | 10         | 11         | 2         | 5         | 3         | 1         | 2         |
|           | Female 10 | 2         | 10         | 9          | 3         | 6         | 4         | 1         | 3         |
| 2nd       | Male 1    | 1         | 10         | 11         | 3         | 6         | 4         | 1         | 3         |
|           | Male 2    | 2         | 11         | 12         | 3         | 7         | 5         | 2         | 4         |
|           | Male 3    | 1         | 12         | 13         | 3         | 6         | 4         | 1         | 3         |
|           | Male 4    | 2         | 10         | 10         | 4         | 5         | 5         | 1         | 4         |
|           | Male 5    | 2         | 10         | 10         | 3         | 6         | 4         | 1         | 3         |
|           | Male 6    | 2         | 10         | 10         | 3         | 7         | 4         | 2         | 3         |
|           | Male 7    | 2         | 12         | 9          | 3         | 6         | 5         | 2         | 3         |
|           | Male 8    | 2         | 13         | 11         | 3         | 7         | 4         | 2         | 3         |
|           | Male 9    | 1         | 11         | 9          | 3         | 6         | 4         | 2         | 3         |
|           | Male 10   | 1         | 9          | 11         | 3         | 7         | 4         | 1         | 3         |
|           | Female 1  | 2         | 12         | 10         | 3         | 7         | 4         | 2         | 3         |
|           | Female 2  | 1         | 11         | 14         | 3         | 5         | 4         | 1         | 3         |
|           | Female 3  | 1         | 11         | 13         | 3         | 6         | 4         | 1         | 4         |
|           | Female 4  | 1         | 10         | 13         | 3         | 6         | 4         | 1         | 3         |
|           | Female 5  | 1         | 9          | 13         | 3         | 5         | 4         | 1         | 3         |
|           | Female 6  | 1         | 9          | 9          | 3         | 6         | 4         | 1         | 4         |
|           | Female 7  | 2         | 12         | 10         | 4         | 6         | 5         | 1         | 4         |
|           | Female 8  | 1         | 10         | 10         | 3         | 6         | 4         | 2         | 3         |
|           | Female 9  | 1         | 10         | 12         | 3         | 6         | 4         | 1         | 3         |
|           | Female 10 | 1         | 11         | 10         | 3         | 6         | 5         | 1         | 4         |
| mean (SD) |           | 1.5 (0.5) | 10.7 (1.1) | 10.9 (1.6) | 3.1 (0.3) | 6.2 (0.7) | 4.4 (0.7) | 1.5 (0.5) | 3.3 (0.5) |

B

| Cbll      |           | tCr       | GABA      | Gln       | Glu       | GSH       | mI        | tNAA      | tCho      |
|-----------|-----------|-----------|-----------|-----------|-----------|-----------|-----------|-----------|-----------|
| 1st       | Male 1    | 1         | 10        | 12        | 4         | 5         | 4         | 2         | 2         |
|           | Male 2    | 2         | 8         | 8         | 4         | 6         | 5         | 2         | 3         |
|           | Male 3    | 1         | 8         | 8         | 3         | 5         | 4         | 1         | 2         |
|           | Male 4    | 2         | 11        | 12        | 6         | 8         | 6         | 3         | 4         |
|           | Male 5    | 1         | 10        | 8         | 3         | 5         | 4         | 1         | 2         |
|           | Male 6    | 1         | 11        | 10        | 4         | 6         | 4         | 2         | 2         |
|           | Male 7    | 1         | 9         | 8         | 4         | 6         | 4         | 2         | 2         |
|           | Male 8    | 1         | 7         | 8         | 3         | 4         | 3         | 1         | 2         |
|           | Male 9    | 1         | 9         | 7         | 4         | 7         | 4         | 2         | 2         |
|           | Male 10   | 2         | 8         | 10        | 5         | 6         | 6         | 2         | 3         |
|           | Female 1  | 2         | 9         | 11        | 4         | 6         | 4         | 2         | 3         |
|           | Female 2  | 2         | 9         | 9         | 4         | 5         | 4         | 2         | 3         |
|           | Female 3  | 1         | 9         | 9         | 3         | 5         | 4         | 1         | 2         |
|           | Female 4  | 2         | 10        | 11        | 4         | 6         | 4         | 2         | 3         |
|           | Female 5  | 1         | 14        | 9         | 4         | 5         | 3         | 1         | 2         |
|           | Female 6  | 1         | 9         | 7         | 4         | 5         | 4         | 1         | 2         |
|           | Female 7  | 2         | 8         | 8         | 4         | 5         | 5         | 2         | 3         |
|           | Female 8  | 2         | 10        | 10        | 5         | 10        | 3         | 2         | 3         |
|           | Female 9  | 1         | 16        | 10        | 4         | 6         | 4         | 1         | 3         |
|           | Female 10 | 1         | 9         | 9         | 3         | 5         | 4         | 1         | 2         |
| 2nd       | Male 1    | 1         | 10        | 10        | 4         | 6         | 4         | 2         | 2         |
|           | Male 2    | 1         | 9         | 9         | 4         | 5         | 3         | 1         | 2         |
|           | Male 3    | 1         | 15        | 16        | 4         | 6         | 4         | 2         | 2         |
|           | Male 4    | 1         | 9         | 8         | 5         | 5         | 4         | 2         | 2         |
|           | Male 5    | 1         | 9         | 8         | 4         | 5         | 5         | 2         | 2         |
|           | Male 6    | 2         | 8         | 12        | 5         | 7         | 5         | 2         | 3         |
|           | Male 7    | 1         | 8         | 8         | 3         | 5         | 4         | 1         | 2         |
|           | Male 8    | 1         | 8         | 8         | 4         | 5         | 4         | 2         | 2         |
|           | Male 9    | 1         | 9         | 9         | 3         | 5         | 4         | 1         | 2         |
|           | Male 10   | 1         | 8         | 11        | 4         | 6         | 3         | 1         | 2         |
|           | Female 1  | 2         | 9         | 8         | 5         | 6         | 4         | 2         | 3         |
|           | Female 2  | 1         | 9         | 10        | 4         | 5         | 4         | 1         | 2         |
|           | Female 3  | 1         | 11        | 10        | 4         | 6         | 4         | 2         | 2         |
|           | Female 4  | 1         | 8         | 8         | 4         | 5         | 4         | 1         | 3         |
|           | Female 5  | 1         | 9         | 12        | 4         | 6         | 4         | 2         | 2         |
|           | Female 6  | 1         | 10        | 8         | 4         | 6         | 4         | 2         | 2         |
|           | Female 7  | 2         | 17        | 9         | 4         | 10        | 6         | 2         | 3         |
|           | Female 8  | 1         | 10        | 7         | 4         | 5         | 4         | 2         | 2         |
|           | Female 9  | 1         | 7         | 9         | 3         | 5         | 4         | 2         | 2         |
|           | Female 10 | 1         | 10        | 9         | 3         | 5         | 4         | 2         | 2         |
| mean (SD) |           | 1.3 (0.5) | 9.7 (2.2) | 9.3 (1.8) | 4.0 (0.7) | 5.8 (1.2) | 4.1 (0.7) | 1.7 (0.5) | 2.4 (0.5) |

Supplemental Table S1. Cramér–Rao Lower bound (CRLB) in PCC and Cbll.

All CRLB values of each metabolite, which had the mean CRLB less than 15%, were demonstrated (A. PCC, B. Cbll).

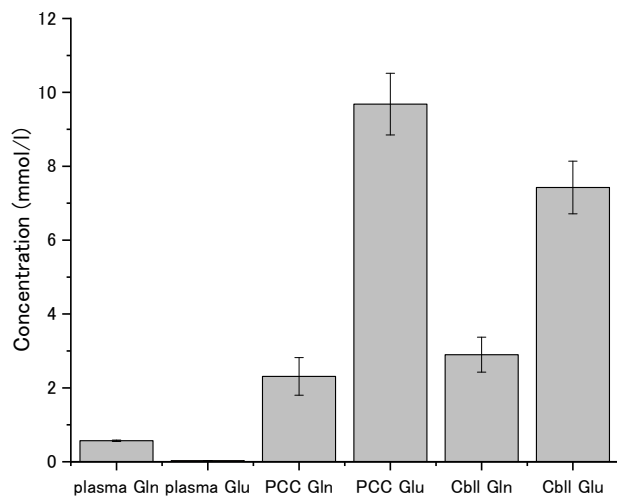

### Supplemental Figure S1. Concentrations of Glutamine and Glutamate in plasma and brain.

Concentrations of Glutamine and Glutamate in plasma and brain (PCC and Cbll) are demonstrated. While concentrations of Gln in plasma and brain are in the same order, the differences of Glu concentrations in plasma and brain are huge, indicating that the transportabilities of Gln and Glu are different between plasma and brain.

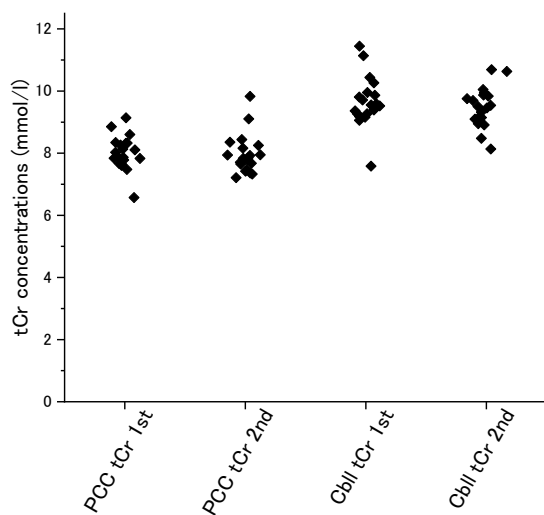

### Supplemental Figure S2. tCr concentrations in PCC and Cbll of two measurements.

Each concentration of tCr in all measurements were shown.
